# Supplementary material
Source: publisher figshare collection journal article supplement (https://frontiersin.figshare.com/ndownloader/files/29090724)
Supplement: Supplementary file 1 [file 29090724]

## *Supplementary Material*

**SUPPLEMENTARY TABLE S1** | List of symbols.

| <b>Symbol</b> | <b>Description</b>                                                    |
|---------------|-----------------------------------------------------------------------|
| $b$           | Constant                                                              |
| $\beta$       | Reciprocal value of $C_C$                                             |
| $C$           | Oxygen concentration                                                  |
| $C_C$         | Critical oxygen concentration (delimiting oxygen default from excess) |
| $\varepsilon$ | Molar extinction coefficient                                          |
| $ep$          | Sample thickness                                                      |
| $E'$          | Storage modulus                                                       |
| $E''$         | Loss modulus                                                          |
| $E^*$         | Complex modulus                                                       |
| $f$           | Crosslink node functionality                                          |
| $F$           | Flex parameter                                                        |
| $\gamma_i$    | Formation yield of a given chemical species in elementary reaction i) |
| $K$           | Apparent first-order rate constant                                    |
| $K_{DM}$      | Di Marzio's constant                                                  |
| $k_i$         | Rate constant of elementary reaction i)                               |
| $n$           | Concentration of crosslink nodes                                      |
| $\nu$         | Concentration of elastically active chains                            |
| $OD$          | Optical density in infra-red spectrum                                 |
| $O_2$         | Oxygen                                                                |
| $P^\bullet$   | Alkyl radical                                                         |

|                              |                                                                |
|------------------------------|----------------------------------------------------------------|
| PH                           | Oxidation site                                                 |
| P=O                          | Carbonyl species                                               |
| P <sub>O2</sub>              | Oxygen partial pressure in the exposure environment            |
| PO <sub>2</sub> <sup>•</sup> | Peroxy radical                                                 |
| POOH                         | Hydroperoxide                                                  |
| Q                            | Oxygen consumption                                             |
| r                            | Rate of a given chemical event                                 |
| r <sub>0</sub>               | Steady rate in oxygen excess of a given chemical event         |
| r <sub>∞</sub>               | Steady rate in general case of a given chemical event          |
| S                            | Concentration of chain scissions                               |
| S <sub>O2</sub>              | Oxygen solubility into polymer                                 |
| X                            | Concentration of crosslinking events                           |
| t                            | Time                                                           |
| t <sub>F</sub>               | Lifetime                                                       |
| T                            | Temperature                                                    |
| T <sub>g</sub>               | Glass transition temperature                                   |
| T <sub>gF</sub>              | End-of-life criterion                                          |
| T <sub>gl</sub>              | Glass transition temperature of an hypothetical linear polymer |
| [ ]                          | Concentration of a given chemical species                      |
| [ ] <sub>0</sub>             | Initial concentration of a given chemical species              |
| [ ] <sub>∞</sub>             | Steady concentration of a given chemical species               |

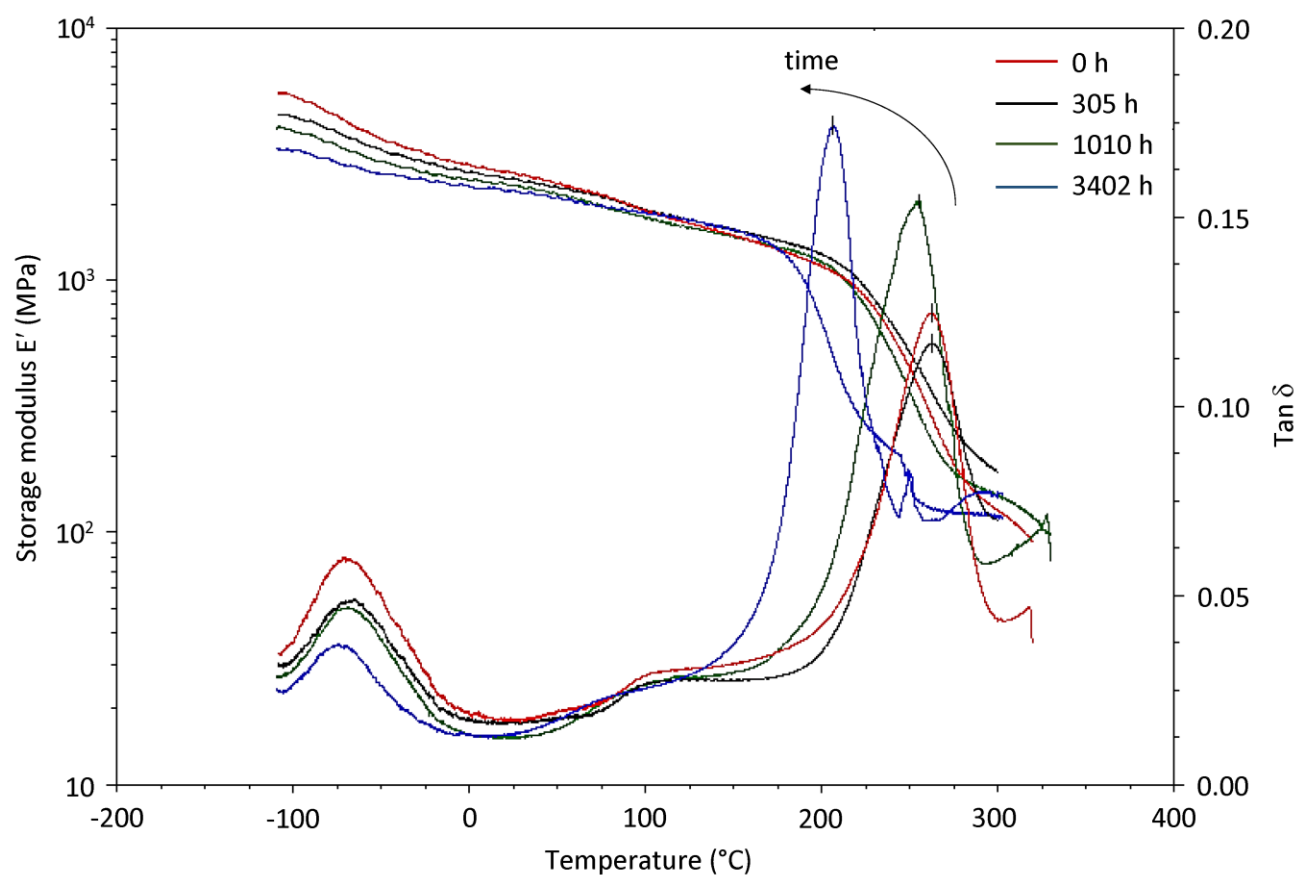

**SUPPLEMENTARY FIGURE S1** | Examples of changes in the DMA thermogram of network No. 3 (Tactix 123/Tactix 742-DDS) during its thermal ageing at 200°C under 0.21 bar of oxygen (i.e., ambient air).
